# Supplementary material for: Self-protection strategies and health behaviour in patients with inflammatory rheumatic diseases during the COVID-19 pandemic: results and predictors in more than 12 000 patients with inflammatory rheumatic diseases followed in the Danish DANBIO registry
Source: HighWire-hosted journal article supplement (doi:10.1136/rmdopen-2020-001505), 2021-01-01

**Supplementary Table 1.**

**Characteristics of patients who a) were potentially eligible, b) were invited in E-boks\*, c) were invited and did not complete questionnaire, and d) completed questionnaire**

| Patient characteristics                                                                                                                                                                                                                                                                                 |        | a) Potentially eligible for inclusion <sup>§</sup><br>N=36,152 | b) Had access to E-boks* and received invitation<br>N=32,766 | c) Had access to E-boks and did not complete questionnaire<br>N=19,977 | d) Completed questionnaire<br>N=12,789 |
|---------------------------------------------------------------------------------------------------------------------------------------------------------------------------------------------------------------------------------------------------------------------------------------------------------|--------|----------------------------------------------------------------|--------------------------------------------------------------|------------------------------------------------------------------------|----------------------------------------|
| Gender, n (%)                                                                                                                                                                                                                                                                                           | Female | 23167 (64)                                                     | 20651 (63)                                                   | 12285 (61)                                                             | 8366 (65)                              |
| Age, years, n (%)                                                                                                                                                                                                                                                                                       | ≤39    | 4878 (13)                                                      | 4840 (15)                                                    | 3844 (19)                                                              | 996 (8)                                |
|                                                                                                                                                                                                                                                                                                         | 40-59  | 12574 (35)                                                     | 12281 (37)                                                   | 7845 (39)                                                              | 4436 (35)                              |
|                                                                                                                                                                                                                                                                                                         | 60-79  | 16115 (45)                                                     | 14226 (43)                                                   | 7427 (37)                                                              | 6799 (53)                              |
|                                                                                                                                                                                                                                                                                                         | ≥80    | 2585 (7)                                                       | 1419 (4)                                                     | 861 (4)                                                                | 558 (4)                                |
| Diagnosis, n (%)                                                                                                                                                                                                                                                                                        | RA     | 21754 (60)                                                     | 18985 (58)                                                   | 10817 (54)                                                             | 8168 (64)                              |
|                                                                                                                                                                                                                                                                                                         | PsA    | 6112 (17)                                                      | 5766 (18)                                                    | 3698 (19)                                                              | 2068 (16)                              |
|                                                                                                                                                                                                                                                                                                         | AxSpA  | 5718 (16)                                                      | 5573 (17)                                                    | 3815 (19)                                                              | 1758 (14)                              |
|                                                                                                                                                                                                                                                                                                         | Other  | 2568 (7)                                                       | 2442 (7)                                                     | 1647 (8)                                                               | 795 (6)                                |
| <sup>§</sup> Patients in DANBIO with at least one visit during the previous year; * E-boks: secure electronic communication between authorities and individual citizens.<br>Abbreviations: AxSpA: axial spondyloarthritis; IQR: interquartile range; PsA: psoriatic arthritis; RA: rheumatoid arthritis |        |                                                                |                                                              |                                                                        |                                        |

**Supplementary Table 2. Data completeness**

Included patients with available baseline data shown as percentages, %  
Stratified by diagnosis. N=12,789

|                                                                                                                                                                                 | <b>Rheumatoid arthritis<br/>N=8,168</b> | <b>Psoriatic arthritis<br/>N=2,068</b> | <b>Axial spondyloarthritis<br/>N=1,758</b> | <b>Other<br/>N=795</b> |
|---------------------------------------------------------------------------------------------------------------------------------------------------------------------------------|-----------------------------------------|----------------------------------------|--------------------------------------------|------------------------|
| Gender                                                                                                                                                                          | 100                                     | 100                                    | 100                                        | 100                    |
| Age, years                                                                                                                                                                      | 100                                     | 100                                    | 100                                        | 100                    |
| <b>Information captured from the COVID-19 questionnaire:<br/>Self-reported characteristics</b>                                                                                  |                                         |                                        |                                            |                        |
| Lives alone                                                                                                                                                                     | 100                                     | 100                                    | 100                                        | 100                    |
| Highest education                                                                                                                                                               | 99                                      | 100                                    | 99                                         | 100                    |
| Occupational status                                                                                                                                                             | 100                                     | 100                                    | 100                                        | 100                    |
| Comorbidities                                                                                                                                                                   | 94                                      | 93                                     | 92                                         | 92                     |
| PASS                                                                                                                                                                            | 99                                      | 99                                     | 99                                         | 99                     |
| HAQ                                                                                                                                                                             | 100                                     | 100                                    | 99                                         | 99                     |
| Patient global, VAS, mm                                                                                                                                                         | 100                                     | 99                                     | 100                                        | 100                    |
| EQ-5D                                                                                                                                                                           | 97                                      | 97                                     | 98                                         | 93                     |
| <b>Information captured from DANBIO:<br/>Patient- and disease characteristics</b>                                                                                               |                                         |                                        |                                            |                        |
| <b>Rheumatic diagnosis</b>                                                                                                                                                      | 100                                     | 100                                    | 100                                        | 100                    |
| Smoking status                                                                                                                                                                  | 99                                      | 99                                     | 99                                         | 95                     |
| Year of diagnosis                                                                                                                                                               | 94                                      | 89                                     | 92                                         | 70                     |
| Current medication                                                                                                                                                              | 100                                     | 100                                    | 100                                        | 100                    |
| <b>Abbreviations:</b> , EQ-5D: European Quality of life, 5 dimensions; HAQ: health assessment questionnaire; PASS: patient acceptable symptom state; VAS: visual analogue scale |                                         |                                        |                                            |                        |

**Supplementary Table 3. Contacts and care for rheumatic disease, impact of the COVID-19 pandemic up until June 2020.**

Percentages are shown according to all patients included (N=12,789) unless otherwise stated

| Question                                                                                                                                                                                                                                                   | Answering options                           | Reply, n (%) |
|------------------------------------------------------------------------------------------------------------------------------------------------------------------------------------------------------------------------------------------------------------|---------------------------------------------|--------------|
| Did you in March or April 2020 contact the clinic in one of the following ways (>1 answer allowed), n (%)                                                                                                                                                  | Phone                                       | 5257 (41)    |
|                                                                                                                                                                                                                                                            | E-mail                                      | 473 (4)      |
|                                                                                                                                                                                                                                                            | Video-consultation                          | 20 (0)       |
|                                                                                                                                                                                                                                                            | Consultation in clinic                      | 2852 (22)    |
|                                                                                                                                                                                                                                                            | Other*                                      | 894 (7)      |
|                                                                                                                                                                                                                                                            | No                                          | 4501 (35)    |
|                                                                                                                                                                                                                                                            | Missing/no answer                           | 145 (1)      |
| Did you within the last 30 days contact the clinic in one of the following ways (>1 answer allowed), n (%)                                                                                                                                                 | Phone                                       | 3281 (26)    |
|                                                                                                                                                                                                                                                            | E-mail                                      | 368 (3)      |
|                                                                                                                                                                                                                                                            | Video-consultation                          | 8 (0)        |
|                                                                                                                                                                                                                                                            | Consultation in clinic                      | 1876 (15)    |
|                                                                                                                                                                                                                                                            | Other                                       | 616 (5)      |
|                                                                                                                                                                                                                                                            | No                                          | 7050 (55)    |
|                                                                                                                                                                                                                                                            | Missing/no answer                           | 306 (2)      |
| Did the Corona pandemic cause cancelling/delay of a scheduled appointment related to your arthritis (until March 2020), n (%)                                                                                                                              | Yes                                         | 3932 (31)    |
|                                                                                                                                                                                                                                                            | No                                          | 7827 (61)    |
|                                                                                                                                                                                                                                                            | Do not know                                 | 1002 (8)     |
|                                                                                                                                                                                                                                                            | Missing/no answer                           | 28 (0)       |
| If yes to cancelling/delay (n=3932), which appointment (>1 answer allowed) <sup>5</sup> , n (%)                                                                                                                                                            | Physician                                   | 2618 (67)    |
|                                                                                                                                                                                                                                                            | Nurse                                       | 786 (20)     |
|                                                                                                                                                                                                                                                            | Medical infusion therapy                    | 87 (2)       |
|                                                                                                                                                                                                                                                            | Medication hand-out at dept of rheumatology | 352 (9)      |
|                                                                                                                                                                                                                                                            | X-ray etc.                                  | 342 (9)      |
|                                                                                                                                                                                                                                                            | Medical aids                                | 16 (0)       |
|                                                                                                                                                                                                                                                            | Blood sampling                              | 649 (17)     |
|                                                                                                                                                                                                                                                            | Surgery                                     | 72 (2)       |
|                                                                                                                                                                                                                                                            | Physiotherapy                               | 687 (17)     |
|                                                                                                                                                                                                                                                            | Occupational therapist                      | 30 (1)       |
|                                                                                                                                                                                                                                                            | Other                                       | 934 (24)     |
| My access to counselling with my rheumatologist became (until March 2020), n (%)                                                                                                                                                                           | Better                                      | 108 (1)      |
|                                                                                                                                                                                                                                                            | Unchanged                                   | 6060 (47)    |
|                                                                                                                                                                                                                                                            | Worse                                       | 857 (7)      |
|                                                                                                                                                                                                                                                            | Do not know                                 | 3100 (24)    |
|                                                                                                                                                                                                                                                            | Not relevant                                | 2611 (20)    |
|                                                                                                                                                                                                                                                            | Missing                                     | 53 (0)       |
| My options for treatment of my rheumatic disease became (until March 2020), n (%)                                                                                                                                                                          | Better                                      | 78 (1)       |
|                                                                                                                                                                                                                                                            | Unchanged                                   | 6637 (52)    |
|                                                                                                                                                                                                                                                            | Worse                                       | 905 (7)      |
|                                                                                                                                                                                                                                                            | Do not know                                 | 2661 (21)    |
|                                                                                                                                                                                                                                                            | Not relevant                                | 2382 (19)    |
|                                                                                                                                                                                                                                                            | Missing                                     | 126 (0)      |
| Have you required additional information regarding your arthritis during the corona-lock down?                                                                                                                                                             | Yes*                                        | 4856 (38)    |
|                                                                                                                                                                                                                                                            | No                                          | 7640 (60)    |
|                                                                                                                                                                                                                                                            | Do not know                                 | 268 (2)      |
|                                                                                                                                                                                                                                                            | Missing/no answer                           | 25 (0)       |
| <sup>5</sup> Percentage of 'yes' to cancelling/delay of scheduled appointment, summed percentages exceed 100% because >1 answer was allowed per patient                                                                                                    |                                             |              |
| * If yes, who did you contact (>1 answer allowed): rheumatology clinic (N=2408/4856, 50%), other hospital department (133, 3%), general practitioner (1262, 26%), Danish Arthritis Association (1588, 33%), COVID-19 hotline (569, 12%), Other (1473, 30%) |                                             |              |

**Supplementary Table 4. Self-isolation strategies, March 2020.**

Percentages are shown according to all patients included (N=12,789) unless otherwise stated

| Question                                                                                        | Answering options                | Reply, n (%) |
|-------------------------------------------------------------------------------------------------|----------------------------------|--------------|
| How would you describe your situation? n (%)                                                    | Life went on as usual            | 761 (6)      |
|                                                                                                 | Life went on with slight changes | 4347 (34)    |
|                                                                                                 | Life went on with major changes  | 4784 (37)    |
|                                                                                                 | Isolation at hospital or other   | 30 (0)       |
|                                                                                                 | Self-isolation (at home)         | 2765 (22)    |
|                                                                                                 | Other                            | 69 (1)       |
|                                                                                                 | Missing                          | 33 (0)       |
| How many persons were you typically in contact with per day (>2 m distance)? n (%)              | None                             | 1807 (14)    |
|                                                                                                 | 1-5                              | 8881 (70)    |
|                                                                                                 | 6-10                             | 1090 (9)     |
|                                                                                                 | 11-20                            | 553 (4)      |
|                                                                                                 | 21-50                            | 292 (2)      |
|                                                                                                 | >50                              | 132 (1)      |
|                                                                                                 | Missing                          | 34 (0)       |
| How many persons were you typically in face-to-face contact with per day (<2 m distance)? n (%) | None                             | 3365 (26)    |
|                                                                                                 | 1-5                              | 8542 (67)    |
|                                                                                                 | 6-10                             | 474 (4)      |
|                                                                                                 | 11-20                            | 196 (2)      |
|                                                                                                 | 21-50                            | 81 (1)       |
|                                                                                                 | >50                              | 53 (0)       |
|                                                                                                 | Missing                          | 78 (1)       |
| Did you leave the home for shopping? n (%)                                                      | Yes                              | 9039 (71)    |
|                                                                                                 | No                               | 3688 (29)    |
|                                                                                                 | Do not know                      | 31 (0)       |
|                                                                                                 | Missing                          | 31 (0)       |
| If yes to above (n=9039), how often did you leave home for shopping? n (%)                      | Several times a day              | 152 (2)      |
|                                                                                                 | Once a day                       | 1104 (12)    |
|                                                                                                 | Several times a week             | 3748 (41)    |
|                                                                                                 | Once a week                      | 3652 (40)    |
|                                                                                                 | Less than weekly                 | 381 (4)      |
|                                                                                                 | Missing/not relevant             | 2 (0)        |
| Did you change your physical shopping habits? n (%)                                             | Yes, shopped less frequently     | 5745 (45)    |
|                                                                                                 | Yes, shopped more frequently     | 817 (6)      |
|                                                                                                 | Shopped on-line                  | 1055 (8)     |
|                                                                                                 | Others shopped for me            | 2690 (21)    |
|                                                                                                 | No                               | 2313 (18)    |
|                                                                                                 | Do not know                      | 137 (1)      |
|                                                                                                 | Missing                          | 32 (0)       |
| Did you use public transportation? n (%)                                                        | Yes                              | 470 (4)      |
|                                                                                                 | No                               | 12255 (96)   |
|                                                                                                 | Do not know                      | 32 (0)       |
|                                                                                                 | Missing                          | 32 (0)       |
| If you used public transportation (n=470), how often? n (%)                                     | Several times a day              | 69 (15)      |
|                                                                                                 | Once a day                       | 32 (7)       |
|                                                                                                 | Several times a week             | 89 (19)      |
|                                                                                                 | Once a week                      | 88 (19)      |
|                                                                                                 | Less than weekly                 | 190 (41)     |
|                                                                                                 | Missing                          | 2 (0)        |

**Supplementary Table 5. Self-perceived impact of the COVID-19 situation, March and June 2020**

Total N=12,789

| Question                                                                                | Reply, n         |              |             |                 |                     |             |           |
|-----------------------------------------------------------------------------------------|------------------|--------------|-------------|-----------------|---------------------|-------------|-----------|
|                                                                                         | Completely agree | Mostly agree | Neither nor | Mostly disagree | Completely disagree | Do not know | Missing\$ |
| <b>The early stage of the pandemic before Easter, March 2020, n (%)</b>                 |                  |              |             |                 |                     |             |           |
| I considered myself at high risk of COVID-infection                                     | 6527 (51)        | 3032 (24)    | 1368 (11)   | 540 (4)         | 767 (6)             | 520 (4)     | 35 (-)    |
| I considered some of my close relatives at high risk                                    | 5873 (46)        | 2510 (20)    | 1502 (12)   | 605 (5)         | 1364 (11)           | 875 (7)     | 60 (-)    |
| I was very worried to get COVID-19 infection                                            | 5435 (43)        | 3464 (27)    | 1896 (15)   | 933 (7)         | 823 (6)             | 203 (2)     | 35 (-)    |
| I worried more about COVID-19 than about my rheumatic disease                           | 3167 (25)        | 2885 (23)    | 3185 (25)   | 1027 (8)        | 2162 (17)           | 319 (3)     | 44 (-)    |
| My worry about COVID-19 caused me to cancel health-contacts/appointments for arthritis* | 1226 (10)        | 690 (5)      | 2031 (16)   | 528 (4)         | 7179 (56)           | 1062 (8)    | 73 (-)    |
| I tried to keep social distance (avoided groups of persons)                             | 10800 (85)       | 1458 (11)    | 278 (2)     | 106 (1)         | 79 (1)              | 50 (0)      | 18 (-)    |
| I stayed home and avoided others as much as possible                                    | 8032 (63)        | 2985 (23)    | 655 (5)     | 444 (3)         | 592 (5)             | 41 (0)      | 40 (-)    |
| I used gloves during e.g. social activities, shopping                                   | 5107 (40)        | 2107 (17)    | 1376 (11)   | 642 (5)         | 3214 (25)           | 264 (2)     | 79 (-)    |
| I used hand-disinfection during e.g. social activities, shopping                        | 11423 (90)       | 871 (7)      | 160 (1)     | 69 (1)          | 138 (1)             | 74 (1)      | 54 (-)    |
| I used facial mask during social activities                                             | 575 (5)          | 428 (3)      | 1446 (11)   | 448 (4)         | 9422 (74)           | 354 (3)     | 116 (-)   |
| I did nothing specific to protect myself                                                | 657 (5)          | 1039 (8)     | 799 (6)     | 1677 (13)       | 8334 (66)           | 194 (2)     | 89 (-)    |
| My arthritis caused me to self-isolate myself more than others my age                   | 3624 (28)        | 2584 (20)    | 2281 (18)   | 783 (6)         | 2926 (23)           | 554 (4)     | 37 (-)    |
| My arthritis caused me to worry more about my health than others the same age           | 3797 (30)        | 3120 (25)    | 2090 (16)   | 862 (7)         | 2336 (18)           | 518 (4)     | 66 (-)    |
| <b>Current stage of the pandemic (the last 7 days), June 2020, n (%)</b>                |                  |              |             |                 |                     |             |           |
| I consider myself at high risk of COVID-infection                                       | 4280 (34)        | 3578 (29)    | 2048 (16)   | 889 (7)         | 1253 (10)           | 383 (3)     | 358 (-)   |
| I worry about re-opening of the society                                                 | 1222 (10)        | 3599 (29)    | 2976 (24)   | 1794 (14)       | 2486 (20)           | 343 (3)     | 369 (-)   |
| I am very worried to get COVID-19 infection                                             | 2324 (19)        | 3320 (27)    | 2787 (22)   | 1851 (15)       | 1877 (15)           | 274 (2)     | 356 (-)   |
| I worry more about COVID-19 than about my rheumatic disease                             | 1243 (10)        | 2083 (17)    | 3664 (30)   | 1484 (12)       | 3589 (29)           | 323 (3)     | 403 (-)   |
| My worry about COVID-19 cause me to cancel health-contacts/appointments for arthritis** | 510 (4)          | 620 (5)      | 1755 (14)   | 867 (7)         | 7886 (64)           | 765 (6)     | 386 (-)   |
| I try to keep social distance (avoid groups of persons)                                 | 5634 (45)        | 4231 (34)    | 1224 (10)   | 795 (6)         | 469 (4)             | 71 (1)      | 365 (-)   |
| I stay home and avoid others as much as possible                                        | 1937 (16)        | 4124 (33)    | 2151 (17)   | 1947 (16)       | 2180 (18)           | 67 (1)      | 383 (-)   |
| I use gloves during e.g. social activities, shopping                                    | 2896 (23)        | 2063 (17)    | 1410 (11)   | 921 (7)         | 4863 (39)           | 208 (2)     | 428 (-)   |
| I use hand-disinfection during e.g. social activities, shopping                         | 10492 (85)       | 1424 (11)    | 173 (1)     | 90 (1)          | 161 (1)             | 49 (0)      | 400 (-)   |
| I use facial mask during social activities                                              | 360 (3)          | 444 (4)      | 1338 (11)   | 529 (4)         | 9356 (76)           | 300 (2)     | 462 (-)   |
| I do nothing specific to protect myself                                                 | 657 (5)          | 1446 (12)    | 1151 (9)    | 2580 (21)       | 6368 (52)           | 158 (1)     | 427 (-)   |
| My arthritis causes me to self-isolate more than others my age                          | 1924 (16)        | 2761 (22)    | 2536 (21)   | 1109 (9)        | 3451 (28)           | 586 (5)     | 422 (-)   |
| My arthritis causes me to worry more                                                    | 2326 (19)        | 3271 (27)    | 2296 (19)   | 1103 (9)        | 2666 (22)           | 652 (5)     | 475 (-)   |

|                                                                                                                                                                                                                                                                                                                                                                                                                                                                                                                                                                                                                                                                                  |  |  |  |  |  |  |  |
|----------------------------------------------------------------------------------------------------------------------------------------------------------------------------------------------------------------------------------------------------------------------------------------------------------------------------------------------------------------------------------------------------------------------------------------------------------------------------------------------------------------------------------------------------------------------------------------------------------------------------------------------------------------------------------|--|--|--|--|--|--|--|
| about my health than others the same age                                                                                                                                                                                                                                                                                                                                                                                                                                                                                                                                                                                                                                         |  |  |  |  |  |  |  |
| <p><b>*If agree, which appointments did you cancel:</b> Physician (277), Nurse (136), Medical infusion therapy (80), Medication hand-out at dept of rheumatology (238), X-ray etc. (82), Medical aids (7), Blood sampling (595), Surgery (19), Physiotherapy (622), Occupational therapy (16), Other (942)</p> <p><b>** If agree, which appointments did you cancel:</b> Physician (150), Nurse (64), Medical infusion therapy (27), Medication hand-out at dept of rheumatology (86), X-ray etc. (38), Medical aids (11), Blood sampling (218), Surgery (18), Physiotherapy (491), Occupational therapy (21), Other (684)</p> <p>\$Percentages shown do not include missing</p> |  |  |  |  |  |  |  |

**Supplementary table 6. Factors associated with anxiety and self-isolation, June 2020**

Results of multivariable logistic regression analyses

|                         |          | I am very worried to get COVID-19 infection, June<br>N=11,288* |                  | My arthritis causes me to self-isolate myself more than others my age, June<br>N=11,251* |                  |
|-------------------------|----------|----------------------------------------------------------------|------------------|------------------------------------------------------------------------------------------|------------------|
|                         |          | Multivariable HR (95% CI)                                      | p-value          | Multivariable HR (95% CI)                                                                | p-value          |
| Male gender             |          | <b>0.67 (0.62-0.73)</b>                                        | <b>&lt;0.001</b> | <b>0.62 (0.57-0.68)</b>                                                                  | <b>&lt;0.001</b> |
| Age, years              | ≤39      | 1 (ref)                                                        |                  | 1 (ref)                                                                                  |                  |
|                         | 40-59    | 1.13 (0.96-1.33)                                               | 0.1              | 0.93 (0.79-1.09)                                                                         | 0.4              |
|                         | 60-79    | <b>1.35 (1.14-1.61)</b>                                        | <b>0.001</b>     | <b>0.71 (0.59-0.84)</b>                                                                  | <b>&lt;0.001</b> |
|                         | ≥80      | 1.02 (0.78-1.31)                                               | 0.9              | <b>0.49 (0.37-0.64)</b>                                                                  | <b>&lt;0.001</b> |
| Diagnosis               | RA       | 1 (ref)                                                        |                  | 1 (ref)                                                                                  |                  |
|                         | PsA      | 0.95 (0.85-1.06)                                               | 0.4              | 1.04 (0.93-1.16)                                                                         | 0.5              |
|                         | AxSpA    | 0.90 (0.79-1.03)                                               | 0.1              | 0.96 (0.84-1.10)                                                                         | 0.6              |
|                         | Other    | 1.03 (0.87-1.22)                                               | 0.7              | 1.11 (0.93-1.32)                                                                         | 0.3              |
| Lower education, yes    |          | <b>1.17 (1.08-1.27)</b>                                        | <b>&lt;0.001</b> | <b>0.92 (0.85-1.00)</b>                                                                  | <b>0.04</b>      |
| Working, yes**          |          | <b>0.87 (0.79-0.96)</b>                                        | <b>0.005</b>     | <b>0.78 (0.71-0.87)</b>                                                                  | <b>&lt;0.001</b> |
| Cohabitant, yes         |          | 1.05 (0.95-1.16)                                               | 0.3              | 0.91 (0.82-1.00)                                                                         | 0.06             |
| Use of bDMARD, yes      |          | <b>1.49 (1.31-1.70)</b>                                        | <b>&lt;0.001</b> | <b>2.06 (1.79-2.36)</b>                                                                  | <b>&lt;0.001</b> |
| Use of csDMARD, yes     |          | 1.00 (0.88-1.15)                                               | 0.9              | <b>1.18 (1.02-1.36)</b>                                                                  | <b>0.02</b>      |
| PASS, yes,              |          | 1.02 (0.92-1.13)                                               | 0.7              | <b>1.12 (1.01-1.25)</b>                                                                  | <b>0.03</b>      |
| Number of comorbidities | 0        | 1 (ref)                                                        |                  | 1 (ref)                                                                                  |                  |
|                         | 1        | <b>1.28 (1.17-1.40)</b>                                        | <b>&lt;0.001</b> | <b>1.22 (1.10-1.34)</b>                                                                  | <b>&lt;0.001</b> |
|                         | ≥2       | <b>1.65 (1.49-1.83)</b>                                        | <b>&lt;0.001</b> | <b>1.44 (1.29-1.60)</b>                                                                  | <b>&lt;0.001</b> |
| Smoking status          | Current  | 1 (ref)                                                        |                  | 1 (ref)                                                                                  |                  |
|                         | Previous | <b>0.80 (0.71-0.89)</b>                                        | <b>&lt;0.001</b> | <b>0.87 (0.77-0.98)</b>                                                                  | <b>0.03</b>      |
|                         | Never    | <b>0.82 (0.74-0.91)</b>                                        | <b>&lt;0.001</b> | 0.91 (0.82-1.02)                                                                         | 0.1              |
| Q5D, anxiety            |          | <b>0.15 (0.11-0.20)</b>                                        | <b>&lt;0.001</b> | <b>0.053 (0.039-0.072)</b>                                                               | <b>&lt;0.001</b> |

Statistically significant results are shown with bold types  
\*Numbers show patients with available data for multivariable analyses  
\*\*Status before corona lock-down  
Abbreviations: AxSpA: axial spondyloarthritis, bDMARD: biologic disease modifying agent, csDMARD: conventional synthetic DMARD, EQ-5D: European Quality of life, 5 dimensions, PsA: psoriatic arthritis, RA: rheumatoid arthritis

Supplementary Figure 1. Patient disposition

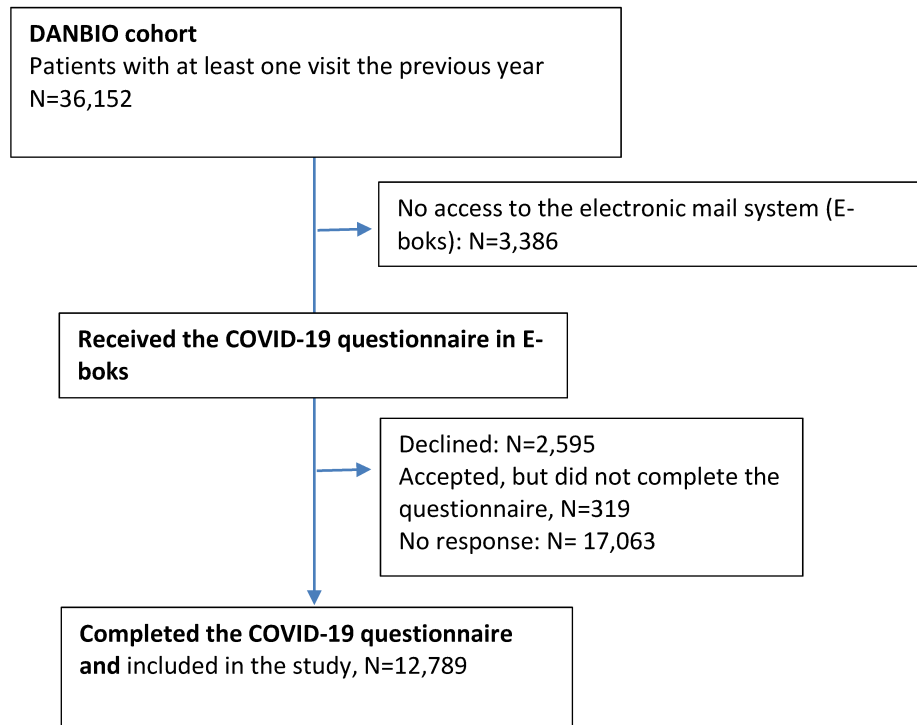



**Supplementary Figure 2. Histogram showing the date of completing the COVID-19 questionnaire**

X-axis: date (yyyymmdd), Y-axis: number of respondents. N=12,789

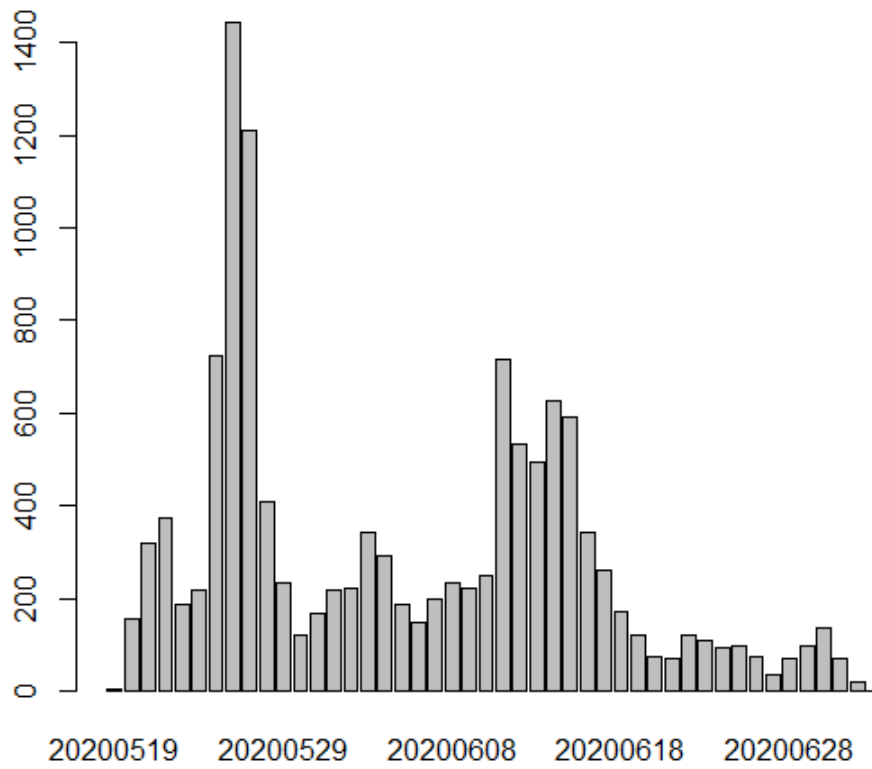

Supplement: rmdopen-2020-001505supp001_data_supplement.pdf [file rmdopen-2020-001505supp001_data_supplement.pdf]
